# Supplementary material for: Alkaloids from Tetrastigma hemsleyanum and Their Anti-Inflammatory Effects on LPS-Induced RAW264.7 Cells
Source: PubMed Central journal article supplement (PMC6099609; doi:10.3390/molecules23061445), 2018-06-14
Supplement: molecules-23-01445-s001.pdf [file molecules-23-01445-s001.pdf]

# Supplementary Materials: Alkaloids from *Tetrastigma hemsleyanum* and Their Anti-Inflammatory Effects on LPS-Induced RAW264.7 Cells

Cai Yi Wang <sup>1,†</sup>, Hyun-Jae Jang <sup>2,†</sup>, Yoo Kyong Han <sup>1</sup>, Xiang Dong Su <sup>1</sup>, Seung Woong Lee <sup>2</sup>, Mun-Chual Rho <sup>2</sup>, Heng-Shan Wang <sup>3</sup>, Seo Young Yang <sup>1,\*</sup> and Young Ho Kim <sup>1,\*</sup>

## Physical and Spectroscopic Data of Compounds

### 1. Indole (1)

- $C_8H_7N$ , colorless solid;  $^1H$ -NMR (400 MHz,  $CD_3OD$ )  $\delta$  8.35 (d,  $J = 8.3$  Hz, 1H, H-2), 8.29 (dd,  $J = 7.0, 2.0$  Hz, 1H, H-4), 7.87 (dd,  $J = 8.0, 7.3$  Hz, 1H, H-5), 7.77 (d,  $J = 8.3$  Hz, 1H, H-3), 7.59 (dd,  $J = 8.0, 7.3$  Hz, 1H, H-6), 6.68 (dd,  $J = 7.0, 2.0$  Hz, 1H, H-7).  $^{13}C$ -NMR (100 MHz,  $CD_3OD$ )  $\delta$  136.21 (C-8), 123.68 (C-2), 127.61 (C-9), 121.49 (C-5), 119.86 (C-4), 118.78 (C-6), 112.97 (C-7), 101.48 (C-3).

### 2. Indole-3-carboxylic acid (2)

- $C_9H_7NO_2$ , yellow solid;  $^1H$ -NMR (400 MHz,  $CD_3OD$ )  $\delta$  7.95 (s, 1H, H-2), 8.07 (dd,  $J = 6.8, 2.0$  Hz, 1H, H-4), 7.87 (m, 7.26–7.12, 1H, H-5), 7.59 (m, 7.26–7.12, 1H, H-6), 7.44 (dd,  $J = 6.8, 2.0$  Hz, 1H, H-7).  $^{13}C$ -NMR (100 MHz,  $CD_3OD$ )  $\delta$  169.27 (C-COOH), 138.21 (C-8), 133.36 (C-2), 127.58 (C-9), 123.57 (C-5), 122.36 (C-6), 122.04 (C-4), 112.87 (C-7), 108.80 (C-3).

### 3. Indole-3-propanoic acid (3)

- $C_{11}H_{11}NO_3$ , colorless needles;  $^1H$ -NMR (400 MHz,  $CD_3OD$ )  $\delta$  7.77 (d,  $J = 8.3$  Hz, 1H, H-3), 7.47 (d,  $J = 7.9$  Hz, 1H, H-4), 7.27 (d,  $J = 8.1$  Hz, 1H, H-7), 7.07 (s, 1H, H-2), 7.03 (t,  $J = 7.4$  Hz, 1H, H-6), 6.95 (t,  $J = 7.4$  Hz, 1H, H-5), 3.13 (t,  $J = 7.0$  Hz, 1H, H- $\alpha$ ), 3.02 (t,  $J = 7.0$  Hz, 1H, H- $\beta$ ).  $^{13}C$ -NMR (100 MHz,  $CD_3OD$ )  $\delta$  177.6 (C-COOH), 138.30 (C-8), 128.13 (C-9), 124.29 (C-2), 122.74 (C-5), 120.03 (C-4), 118.86 (C-6), 112.54 (C-7), 110.25 (C-3), 41.22 (C-( $CH_2$ )<sub>2</sub>), 24.49 (C-( $CH_2$ )<sub>2</sub>).

### 4. 5-Hydroxy-indole-3-aldehyde (4)

- $C_9H_7NO_2$ , colorless needles; UV (MeOH)  $\lambda_{max}$  212, 253, 301 nm;  $^1H$ -NMR (400 MHz,  $CD_3OD$ )  $\delta$  8.02 (s, 1H, H-2), 7.59 (d,  $J = 2.3$  Hz, 1H, H-4), 7.32 (d,  $J = 8.7$  Hz, 1H, H-7), 6.82 (dd,  $J = 8.7, 2.3$  Hz, 1H, H-6).

#### 4.1. X-ray Diffraction Analysis of Compound 4

Single crystal of compound **4** growth from solution of methanol. The X-ray crystallographic data of compound **4** were collected on a Bruker APEX-II CCD diffractometer using Cu  $K\alpha$  radiation. The structures were solved by direct methods using SHELXS-97 [1] and refined with full-matrix least-squares calculations on  $F^2$  using SHELXL-97 [1] via OLEX2. [2] All nonhydrogen atoms were refined anisotropically. The hydrogen atom positions were geometrically idealized and allowed to ride on their parent atoms. Crystallographic data for **4** have been deposited in the Cambridge Crystallographic Data Centre (CCDC). Copies of these data can be obtained free of charge from the CCDC, 12 Union Road, Cambridge CB2 1EZ, UK [fax: +44 (0) 1223-336033 or e-mail: deposit@ccdc.cam.ac.uk].

#### 4.2. Crystallographic Data for 4

A suitable crystal ( $0.18 \times 0.15 \times 0.12$ ) was used for analysis. The data were measured using a Bruker APEX-II CCD diffractometer, using Cu K $\alpha$  graphite-monochromated radiation ( $\lambda = 1.54184 \text{ \AA}$ ). Crystal data: C<sub>9</sub>H<sub>7</sub>NO<sub>2</sub>, M = 161.16, orthorhombic,  $a = 14.5715(4) \text{ \AA}$ ,  $b = 5.87719(15) \text{ \AA}$ ,  $c = 8.4032(2) \text{ \AA}$ ,  $\alpha = 90^\circ$ ,  $\beta = 90^\circ$ ,  $\gamma = 90^\circ$ ,  $V = 719.65(3) \text{ \AA}^3$ ,  $T = 100.01(10) \text{ K}$ , space group Pca2<sub>1</sub>,  $Z = 4$ ,  $\mu(\text{Cu K}\alpha) = 0.886 \text{ mm}^{-1}$ ,  $D_c = 1.487 \text{ g/cm}^3$ ,  $F(000) = 336.0$ . A total of 4321 reflections were collected in the range  $12.148^\circ < \theta < 147.238^\circ$  with 1390 independent reflections [ $R_{\text{int}} = 0.0195$ ,  $R_{\text{sigma}} = 0.0156$ ]. The final  $R_1$  values were 0.0320 [ $I > 2\sigma(I)$ ]. The final  $wR(F^2)$  values were 0.0844 [ $I > 2\sigma(I)$ ]. The final  $R_1$  values were 0.0322 (all data). The final  $wR(F^2)$  values were 0.0850 (all data). The goodness of fit on  $F^2$  was 1.046. Flack parameter: 0.00(10)/0.11(7). CCDC1841613 contains the supplementary crystallographic data for the structure of **4**.

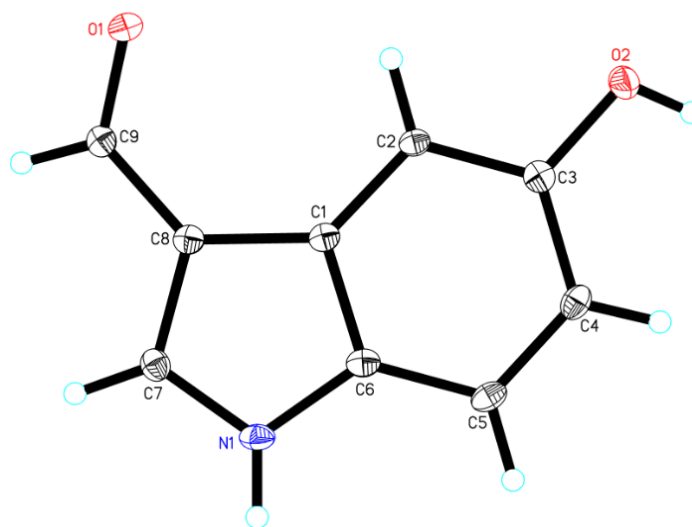

**Figure S1.** Single-crystal structure of compound **4**.

#### 5. 5-Hydroxy-indole-3-carboxylic acid (**5**)

- C<sub>10</sub>H<sub>7</sub>NO<sub>3</sub>, yellow needles; <sup>1</sup>H-NMR (400 MHz, CD<sub>3</sub>OD)  $\delta$  8.33 (s, 1H, H-2), 7.68 (d,  $J = 2.4 \text{ Hz}$ , 1H, H-4), 7.31 (d,  $J = 8.7 \text{ Hz}$ , 1H, H-7), 6.81 (dd,  $J = 8.7, 2.4 \text{ Hz}$ , 1H, H-6). <sup>13</sup>C-NMR (100 MHz, CD<sub>3</sub>OD)  $\delta$  168.01 (C-COOH), 150.71 (C-5), 138.08 (C-2), 135.74 (C-8), 124.76 (C-9), 113.32 (C-7), 112.47 (C-6), 106.21 (C-3), 104.21 (C-4).

#### 6. 6-Hydroxy-3,4-dihydro-1-oxo- $\beta$ -carboline (**6**)

- $C_{11}H_{10}N_2O_2$ , amorphous powder; ESI-MS  $m/z$ : 203.07  $[M+H]^+$ ; UV (MeOH)  $\lambda_{max}$  208, 306 nm;  $^1H$ -NMR (400 MHz,  $CD_3OD$ )  $\delta$  7.27 (d,  $J$  = 8.8 Hz, 1H, H-8), 6.91 (d,  $J$  = 2.0 Hz, 1H, H-5), 6.84 (dd,  $J$  = 8.8, 2.3 Hz, 1H, H-7), 3.62 (t,  $J$  = 7.1 Hz, 2H, H-3), 2.94 (t,  $J$  = 7.1 Hz, 2H, H-4).  $^{13}C$ -NMR (100 MHz,  $CD_3OD$ )  $\delta$  163.7 (C-1), 151.2 (C-6), 133.3 (C-8a), 127.0 (C-9a), 126.1 (C-4b), 119.3 (C-4a), 115.9 (C-7), 113.1 (C-8), 103.3 (C-5), 41.8 (C-3), 20.6 (C-4).

#### 7. Hippo-phamide (7)

- $C_{14}H_{14}N_2O_2$ , amorphous solid; ESI-MS  $m/z$ : 243.14  $[M + H]^+$ ; UV (MeOH)  $\lambda_{max}$  202, 221, 277 nm;  $^1H$ -NMR (400 MHz,  $CD_3OD$ )  $\delta$  7.13 (d,  $J$  = 8.6 Hz, 1H, H-12), 6.80 (d,  $J$  = 2.2 Hz, 1H, H-9), 6.65 (dd,  $J$  = 8.6, 2.4 Hz, 1H, H-11), 5.01 – 4.94 (t-like,  $J$  = 6.9 Hz, 1H, H-3), 4.45 – 4.35 (m, 1H, H-5a), 3.13 – 3.01 (m, 1H, H-5b), 2.76–2.69 (m, 2H, H-6), 2.68–2.62 (m, 1H, H-15a), 2.62–2.57 (m, 1H, H-14a), 2.49–2.38 (m, 1H, H-15b), 1.97 – 1.82 (m, 1H, H-14b).  $^{13}C$  NMR (100 MHz,  $CD_3OD$ )  $\delta$  176.0 (C-16), 151.5 (C-10), 135.6 (C-2), 133.0 (C-13), 128.8 (C-8), 112.5 (C-12), 112.3 (C-11), 107.0 (C-7), 103.4 (C-9), 56.4 (C-3), 39.0 (C-5), 32.6 (C-15), 26.8 (C-14), 22.0 (C-6).

#### 8. 4-Hydroxycinnamide (8)

- $C_9H_9NO_2$ , amorphous powder; ESI-MS  $m/z$ : 162.06  $[M - H]^-$ ; UV (MeOH)  $\lambda_{max}$  218, 328, nm;  $^1H$ -NMR (400 MHz, DMSO):  $\delta$  7.50 (d,  $J$  = 8.5 Hz, H-2, 2H, H-6), 7.46 (d,  $J$  = 16.0 Hz, 1H, H-7), 6.78 (d,  $J$  = 8.5 Hz, 2H, H-3, H-5), 6.29 (d,  $J$  = 16.0 Hz, 1H, H-8).  $^{13}C$ -NMR (150 MHz, DMSO)  $\delta$  168.2 (C-9), 159.6 (C-4), 143.7 (C-7), 131.9 (C-1), 130.0 (C-2,6), 115.8 (C-3,5), 114.8 (C-8).

#### 9. Pyrrole-3-propanoic acid (9)

- $C_8H_9NO_4$ , colorless solid;  $^1H$ -NMR (400 MHz, DMSO)  $\delta$  2.53–2.50 (m, 4H, H-6, 7), 1.78 (s, 3H, H-8).  $^{13}C$ -NMR (100 MHz, DMSO)  $\delta$  176.8 (C-COOH), 173.3 (C-2), 173.0 (C-5), 139.6 (C-3), 138.2 (C-4), 31.9 (C-CH<sub>2</sub>COOH), 18.9 (C-CH<sub>2</sub>CH<sub>2</sub>COOH), 8.2 (C-CH<sub>3</sub>).

#### 10. S(-)-trolline (10)

- $C_{12}H_{13}NO_3$ , colorless solid; ESI-MS  $m/z$ : 218.05  $[M - H]^-$ ; UV (MeOH)  $\lambda_{max}$  209, 286 nm;  $^1H$ -NMR (400 MHz,  $CD_3OD$ )  $\delta$  6.36 (s, 1H, H-10), 6.35 (s, 1H, H-7), 4.56 (t,  $J$  = 8.0, 8.0 Hz, 1H, H-10'), 3.93–3.83 (m, 1H, H-5a), 2.88–2.78 (m, 1H, H-5b), 2.56 (m, 1H, H-1a), 2.46–2.38 (m, 2H, H-6), 2.40–2.29 (m, 1H, H-2a), 2.25–2.15 (m, 1H, H-2b), 1.68–1.54 (m, 1H, H-1b).  $^{13}C$ -NMR (100 MHz,  $CD_3OD$ )  $\delta$  174.3 (C-3), 143.9 (C-9), 143.8 (C-8), 128.3 (C-10'), 124.3 (C-6'), 115.0 (C-7), 111.1 (C-10), 56.8 (C-10''), 37.3 (C-5), 31.4 (C-2), 27.4 (C-6), 27.2 (C-1).

## References

1. Sheldrick, G.M. A short history of shelx. *Acta Cryst. A* **2008**, *64*, 112–122.
2. O.V.; Bourhis, L.J.; Gildea, R.J.; Howard, J.A.; Puschmann, H. Olex2: A complete structure solution, refinement and analysis program. *J. Appl. Cryst.* **2009**, *42*, 339–341.
